# Supplementary material for: Earliest infections predict the age distribution of seasonal influenza A cases
Source: eLife journal article supplement (doi:10.7554/elife.50060), 2020-07-06
Supplement: supp [file elife-50060-supp-v1.zip]

Archive with 21 entries (21 files):
- elife_poa_e50060_Transparent_Reporting_File.pdf
- elife_poa_e50060_Figure_1_figure_supplement_1.pdf
- elife_poa_e50060_Figure_1_figure_supplement_2.pdf
- elife_poa_e50060_Figure_1_figure_supplement_3.pdf
- elife_poa_e50060_Figure_1_figure_supplement_4.pdf
- elife_poa_e50060_Figure_1_figure_supplement_5.pdf
- elife_poa_e50060_Figure_1_figure_supplement_6.pdf
- elife_poa_e50060_Figure_1_figure_supplement_7.pdf
- elife_poa_e50060_Figure_2_figure_supplement_1.pdf
- elife_poa_e50060_Figure_2_figure_supplement_2.pdf
- elife_poa_e50060_Figure_2_figure_supplement_3.pdf
- elife_poa_e50060_Figure_3_figure_supplement_1.pdf
- elife_poa_e50060_Figure_3_figure_supplement_2.pdf
- elife_poa_e50060_Figure_4_figure_supplement_1.pdf
- elife_poa_e50060_Figure_5_figure_supplement_1.pdf
- elife_poa_e50060_Figure_5_figure_supplement_2.pdf
- elife_poa_e50060_Figure_5_figure_supplment_3.pdf
- elife_poa_e50060_Figure_5_figure_supplement_4.pdf
- elife_poa_e50060_Figure_5_figure_supplement_5.pdf
- elife_poa_e50060_Figure_6_figure_supplement_1.pdf
- elife_poa_e50060_Figure_6_figure_supplement_2.pdf
