# Supplementary figures and images for: Earliest infections predict the age distribution of seasonal influenza A cases
Source: eLife journal article supplement (doi:10.7554/elife.50060), 2020-07-06

## 2017-2018 season

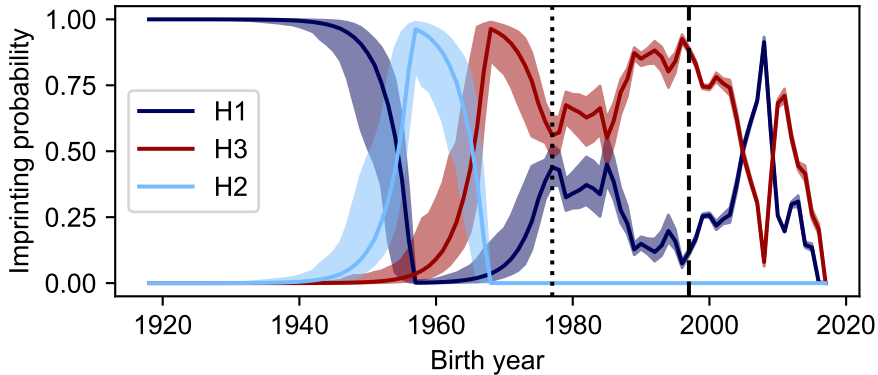

Supplement: supp [file elife-50060-supp-v1.zip]

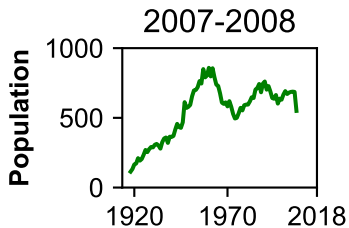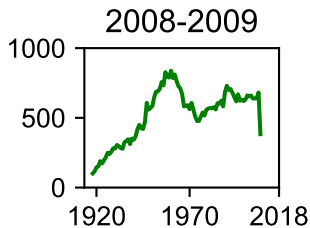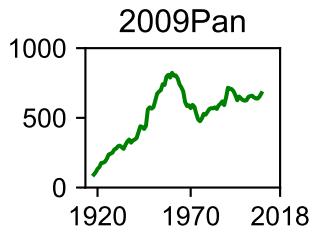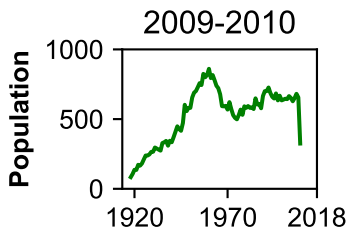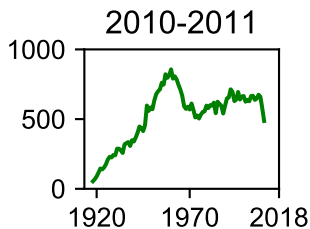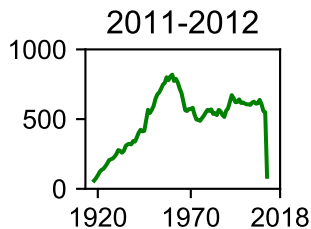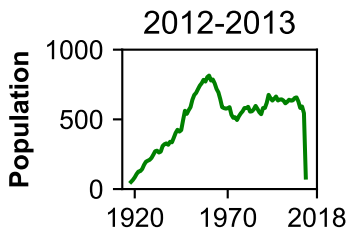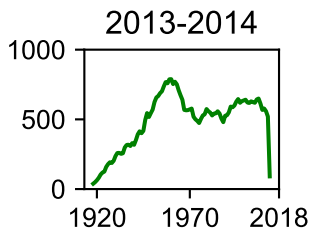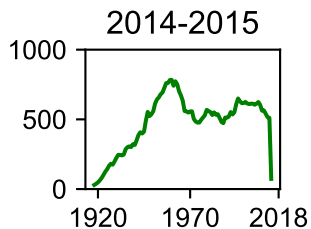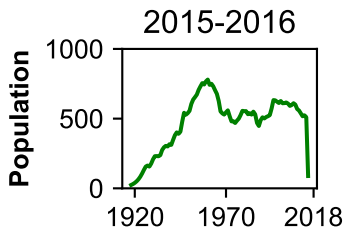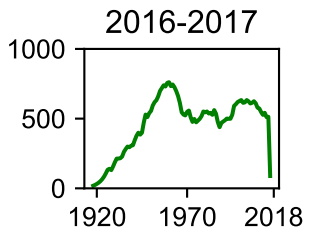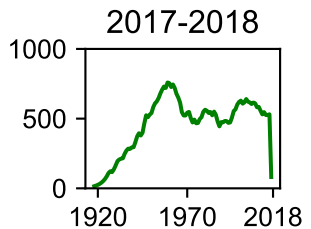

Supplement: supp [file elife-50060-supp-v1.zip]

**A**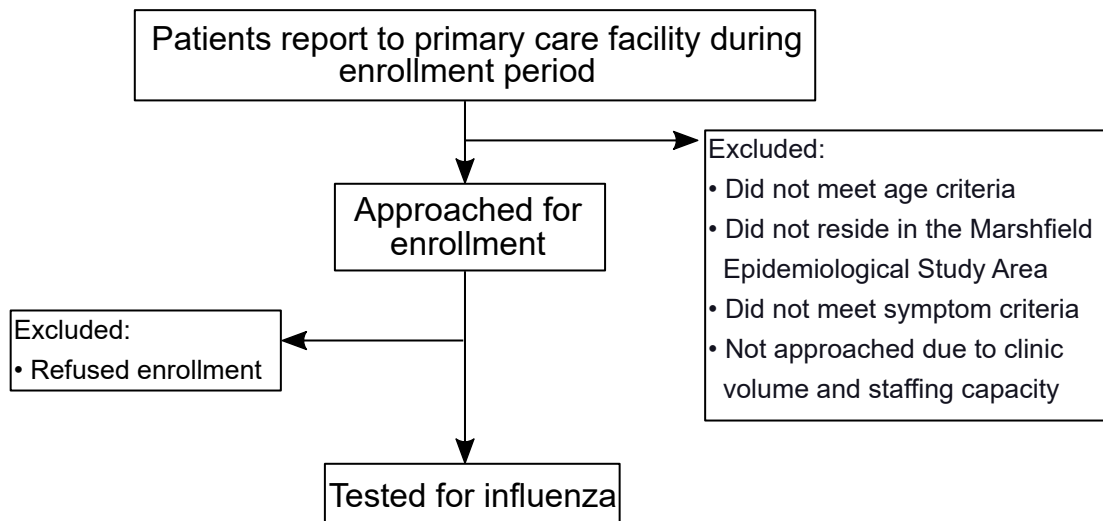**B**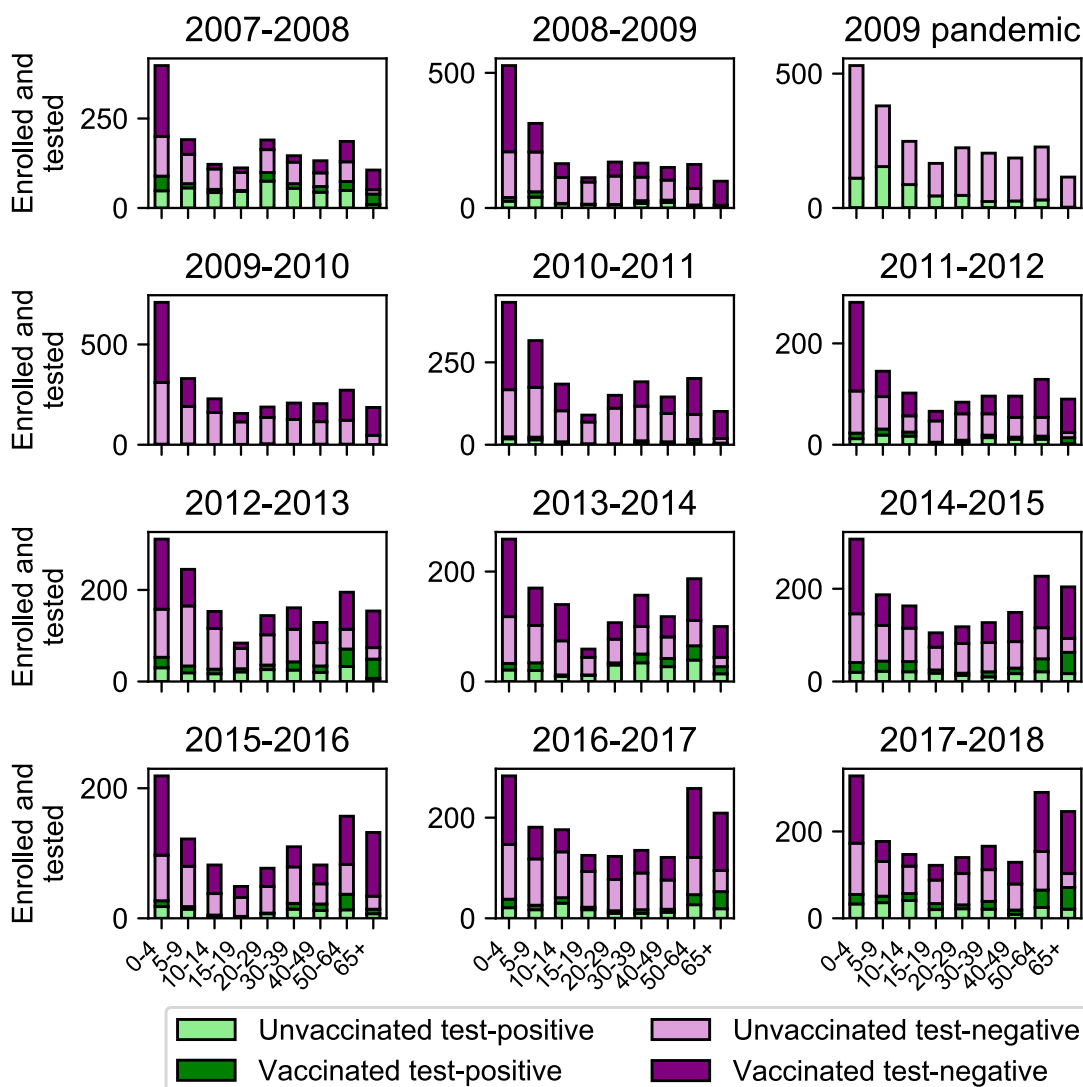

Supplement: supp [file elife-50060-supp-v1.zip]

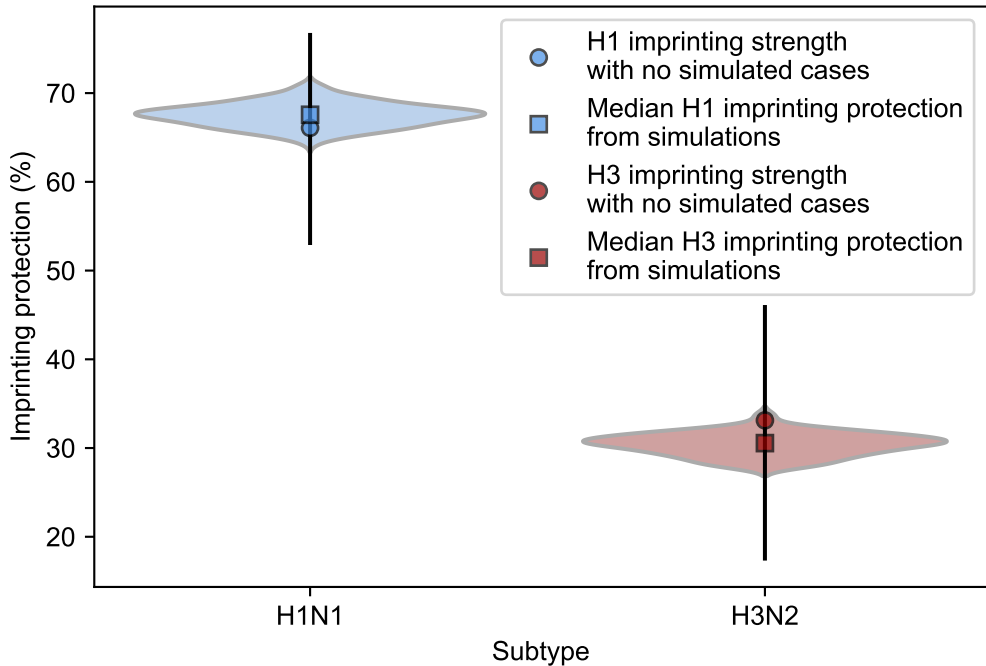

Supplement: supp [file elife-50060-supp-v1.zip]

2007-2008

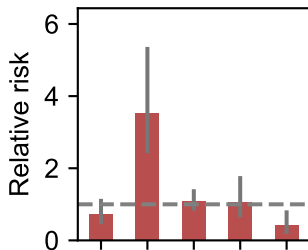

2008-2009

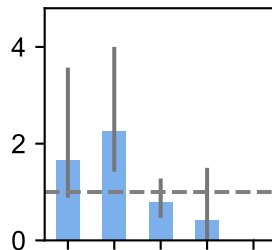

2009 pandemic

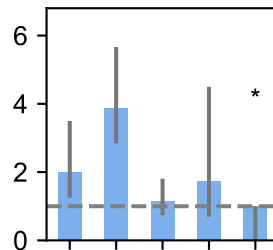

2009-2010

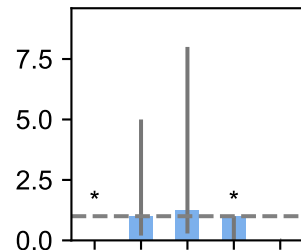

2010-2011

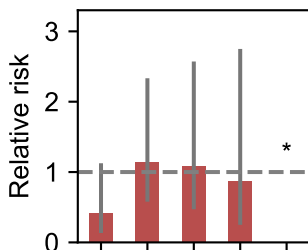

2011-2012

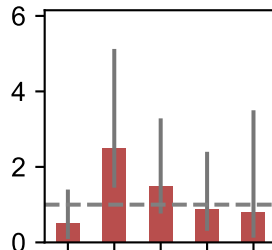

2012-2013

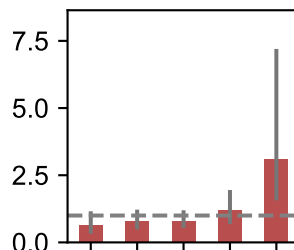

2013-2014

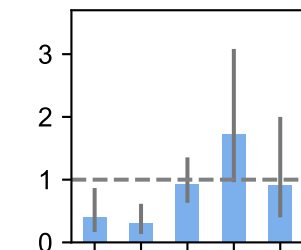

2014-2015

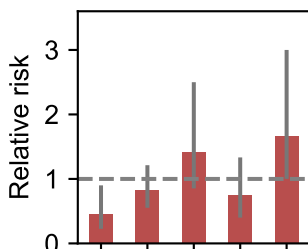

2015-2016

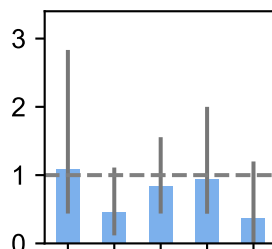

2016-2017

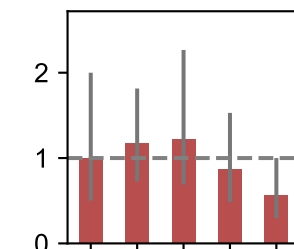

2017-2018

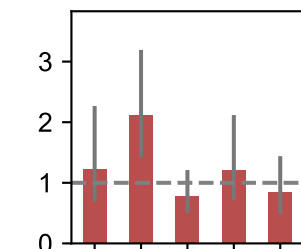

Age group (years)

Age group (years)

Age group (years)

Age group (years)

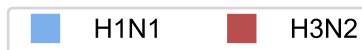

Supplement: supp [file elife-50060-supp-v1.zip]

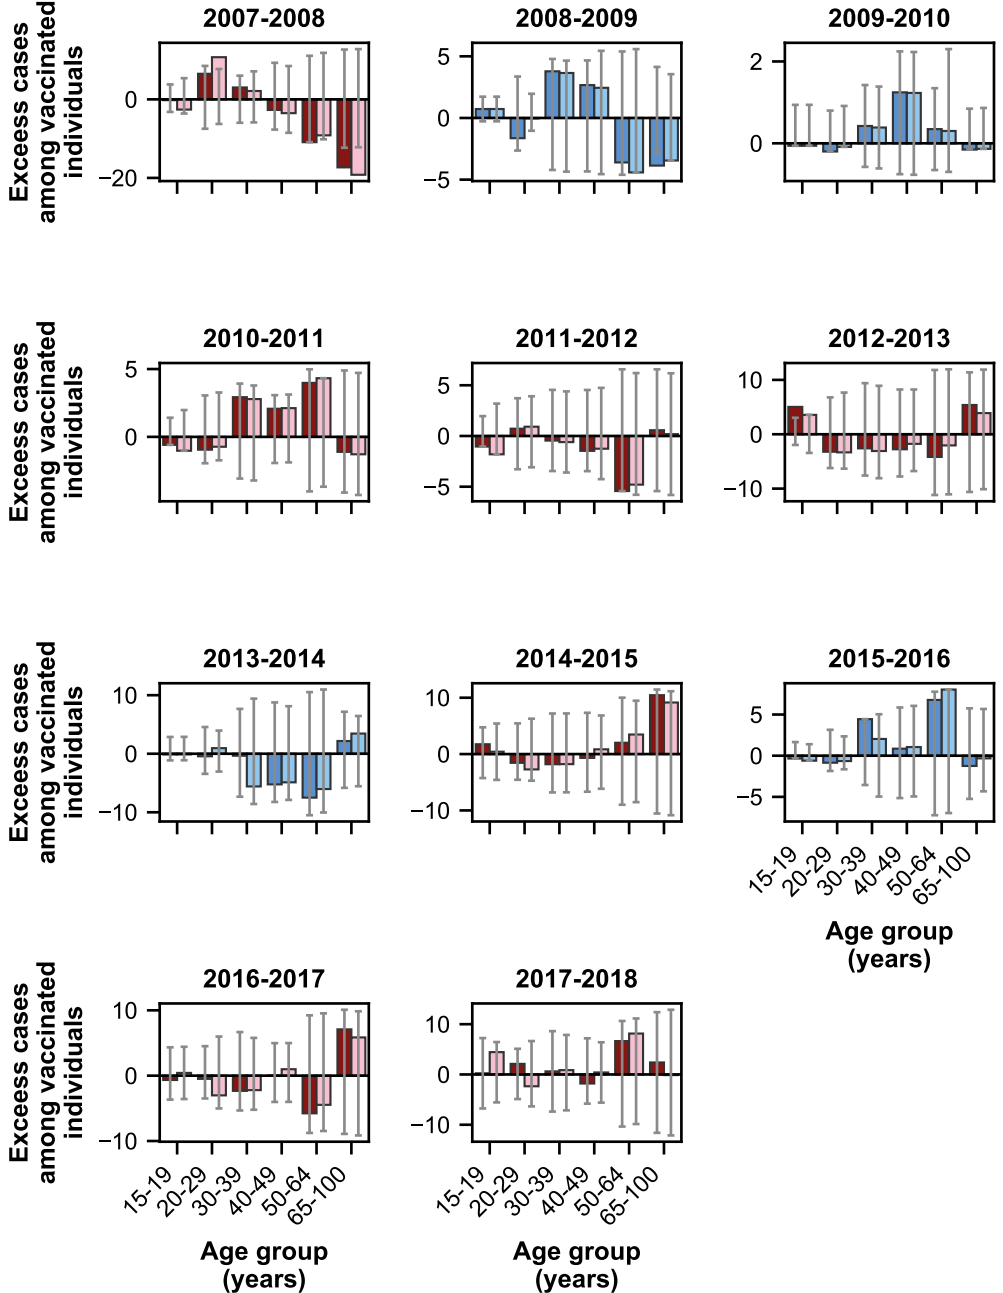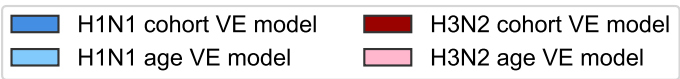

Supplement: supp [file elife-50060-supp-v1.zip]

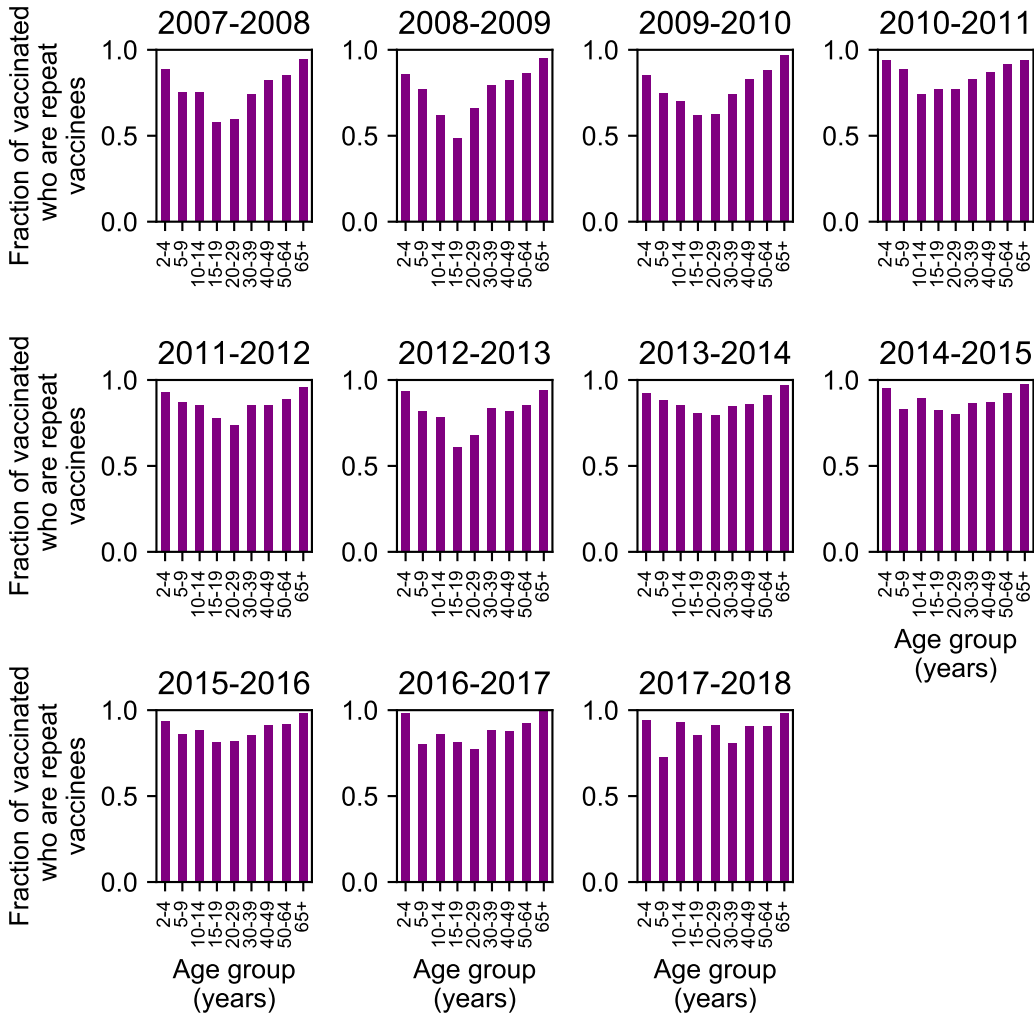

Supplement: supp [file elife-50060-supp-v1.zip]

2007-2008

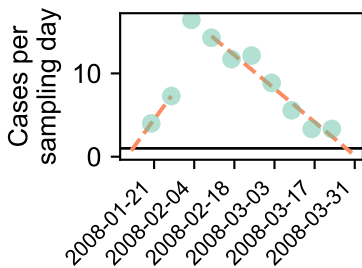

2008-2009

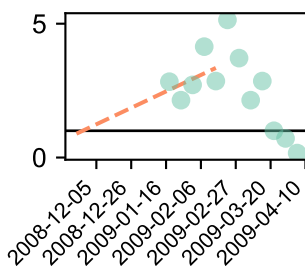

2009 pandemic

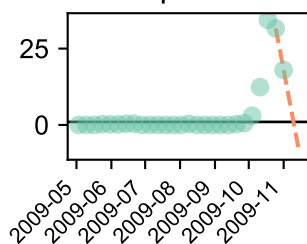

2009-2010

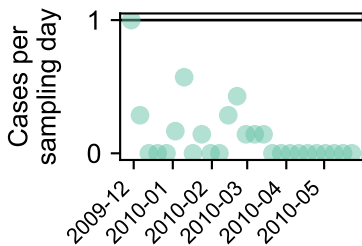

2010-2011

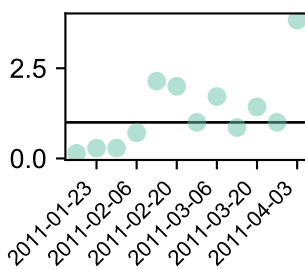

2011-2012

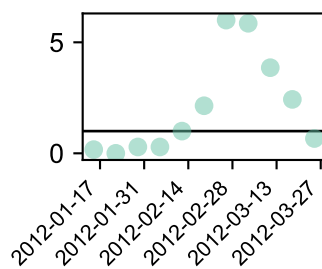

2012-2013

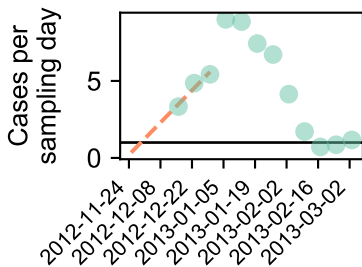

2013-2014

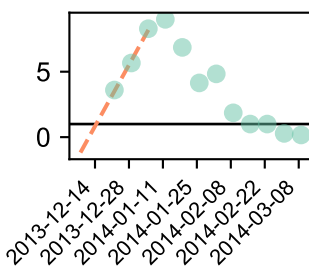

2014-2015

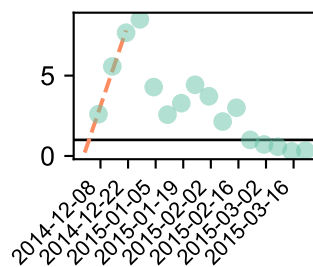

2015-2016

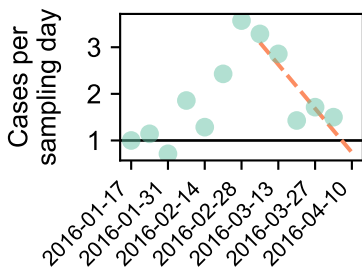

2016-2017

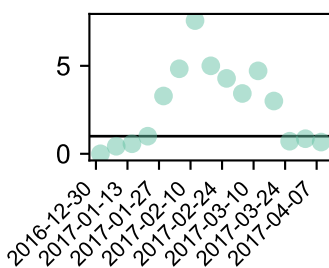

2017-2018

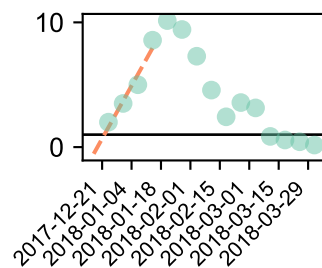

Start date of week

Start date of week

Start date of week

Supplement: supp [file elife-50060-supp-v1.zip]

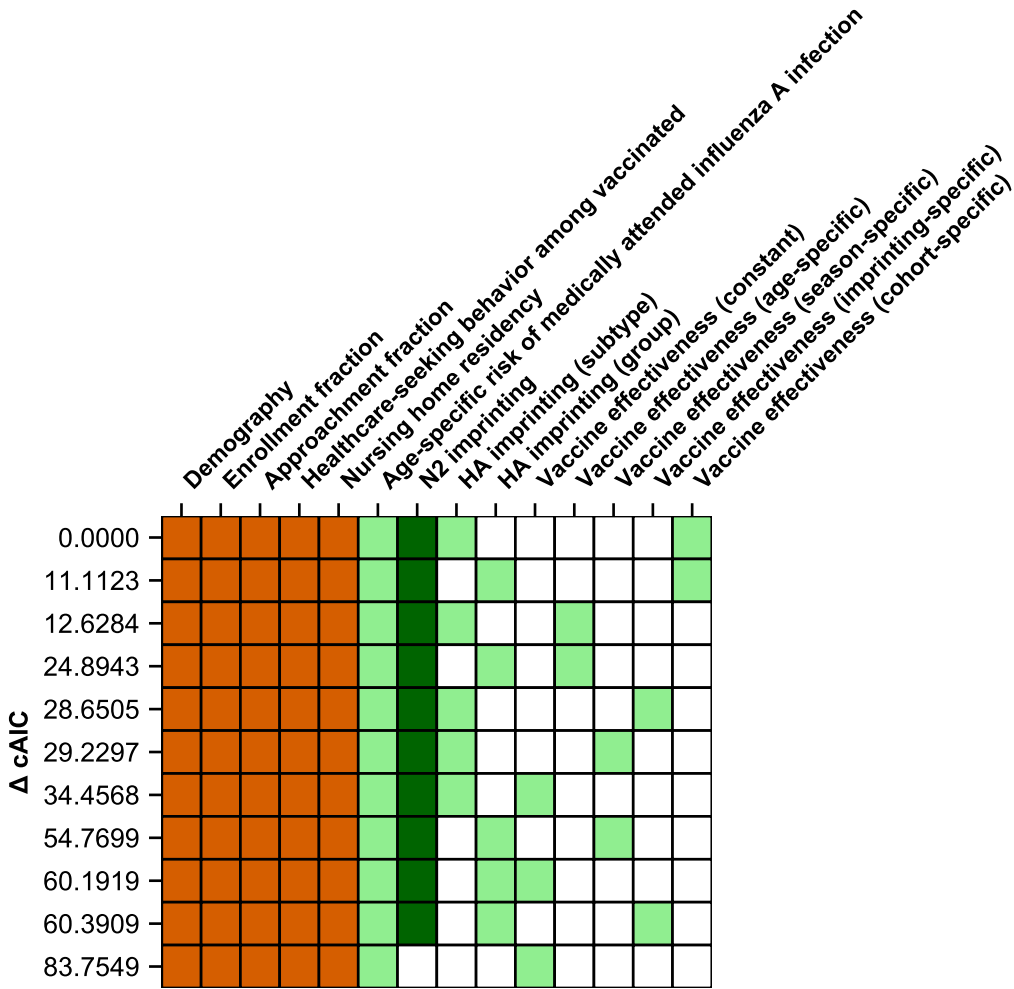

Supplement: supp [file elife-50060-supp-v1.zip]

**A**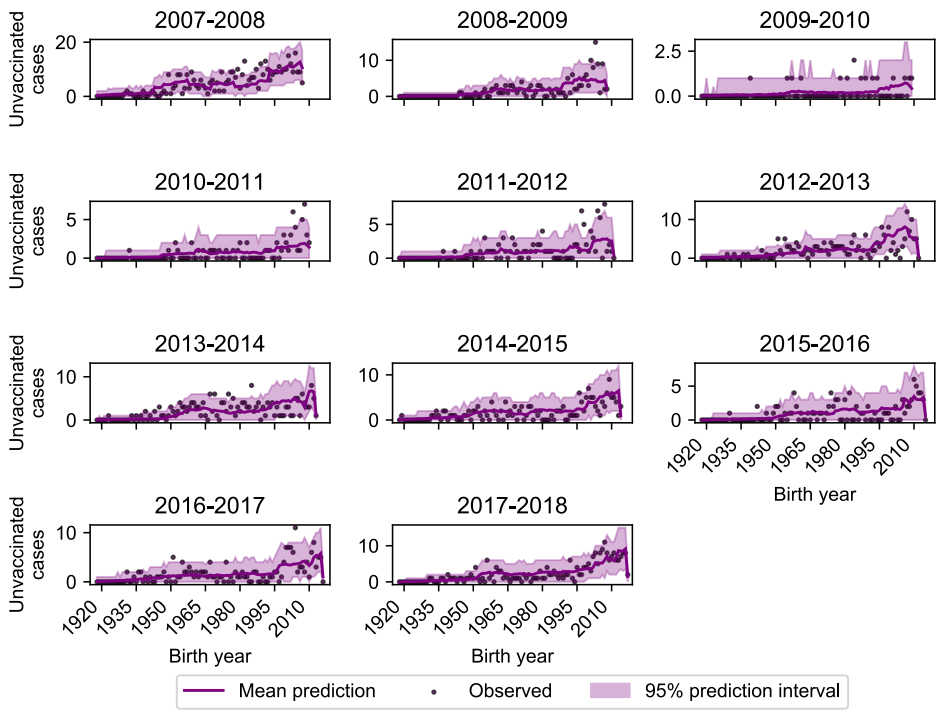**B**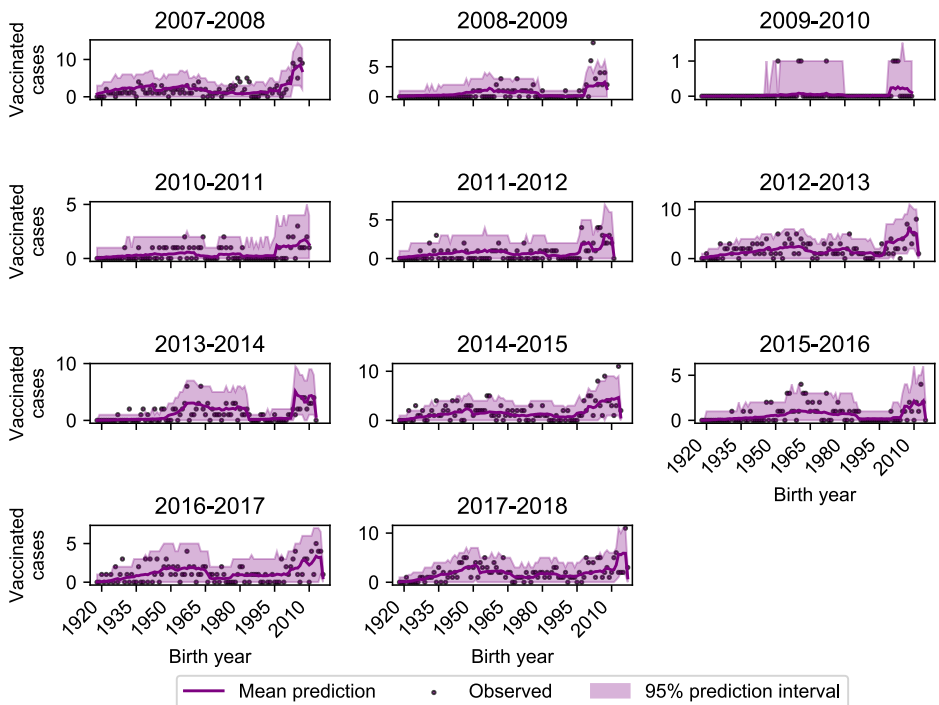

Supplement: supp [file elife-50060-supp-v1.zip]

**A**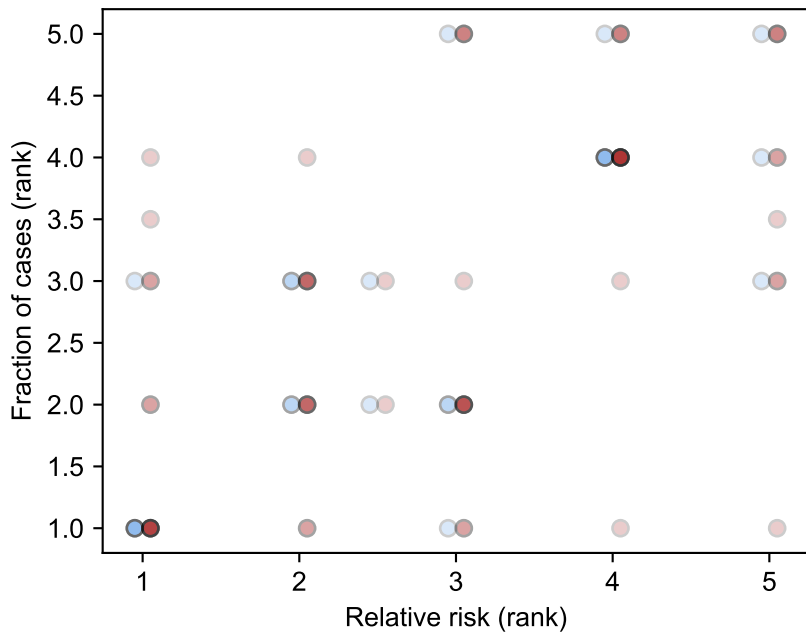**B**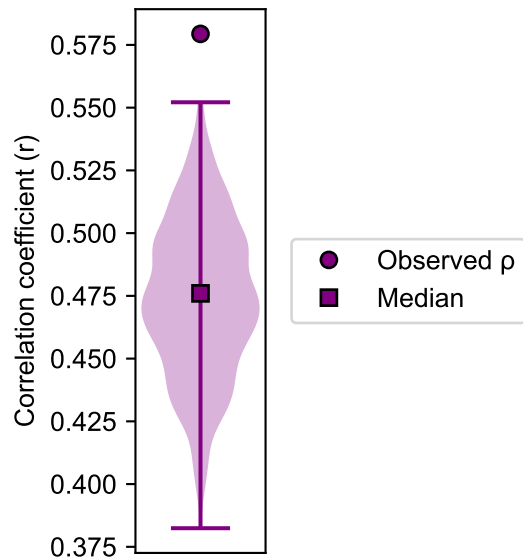

Supplement: supp [file elife-50060-supp-v1.zip]

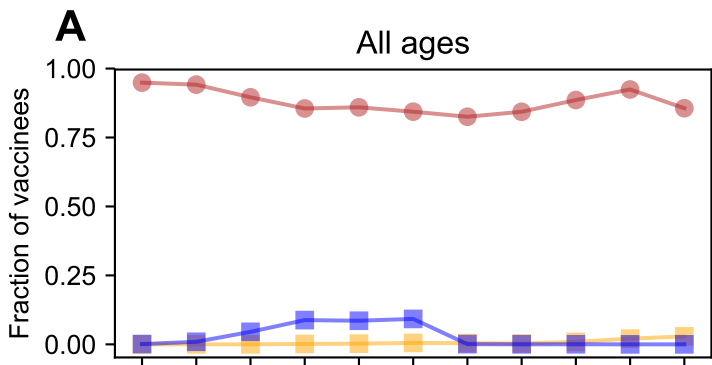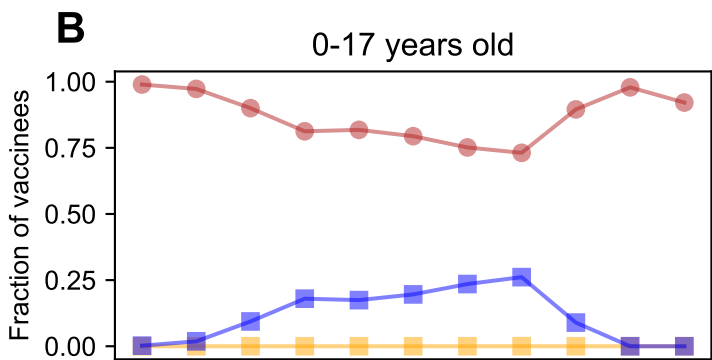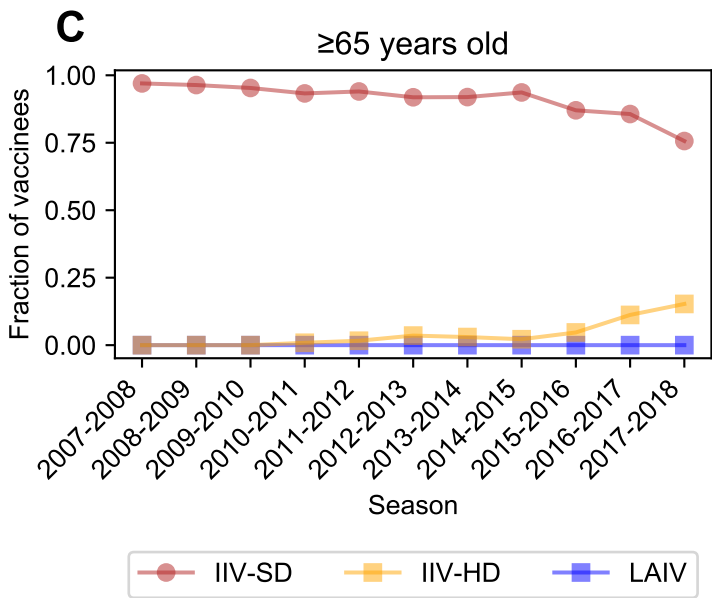

Supplement: supp [file elife-50060-supp-v1.zip]

**H1N1**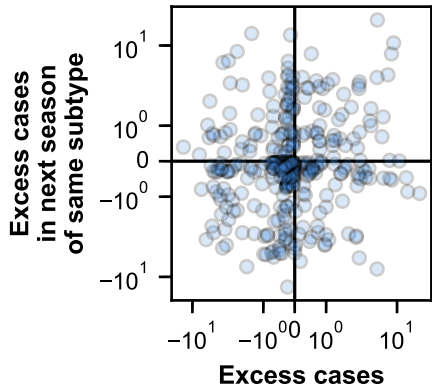**H3N2**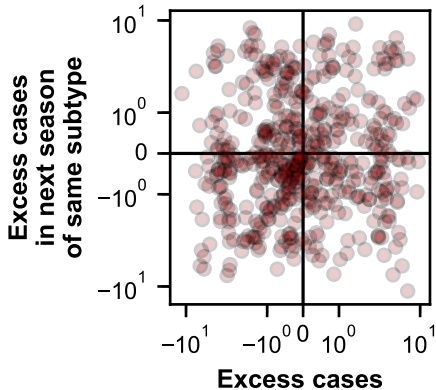

Supplement: supp [file elife-50060-supp-v1.zip]

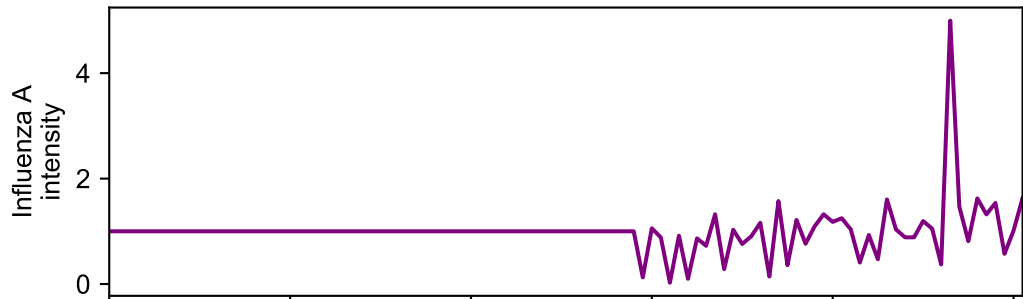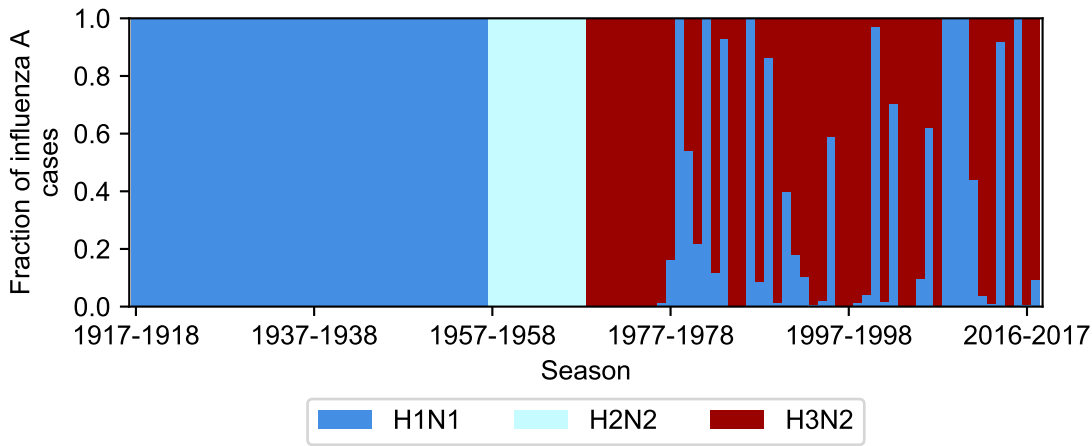

Supplement: supp [file elife-50060-supp-v1.zip]

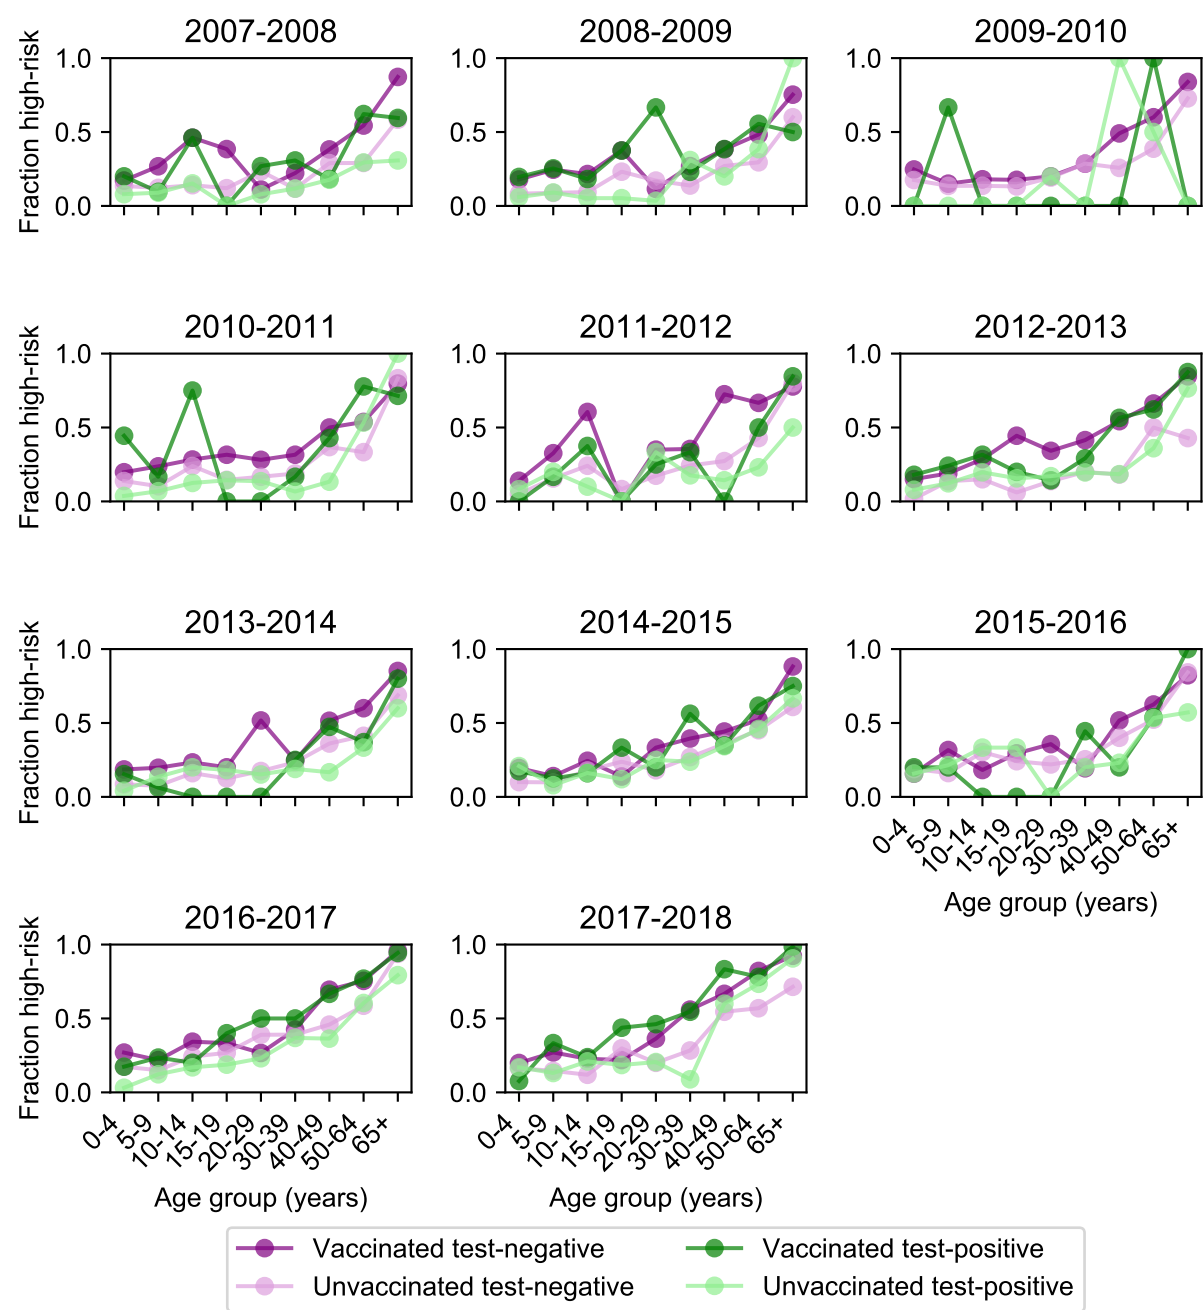

Supplement: supp [file elife-50060-supp-v1.zip]

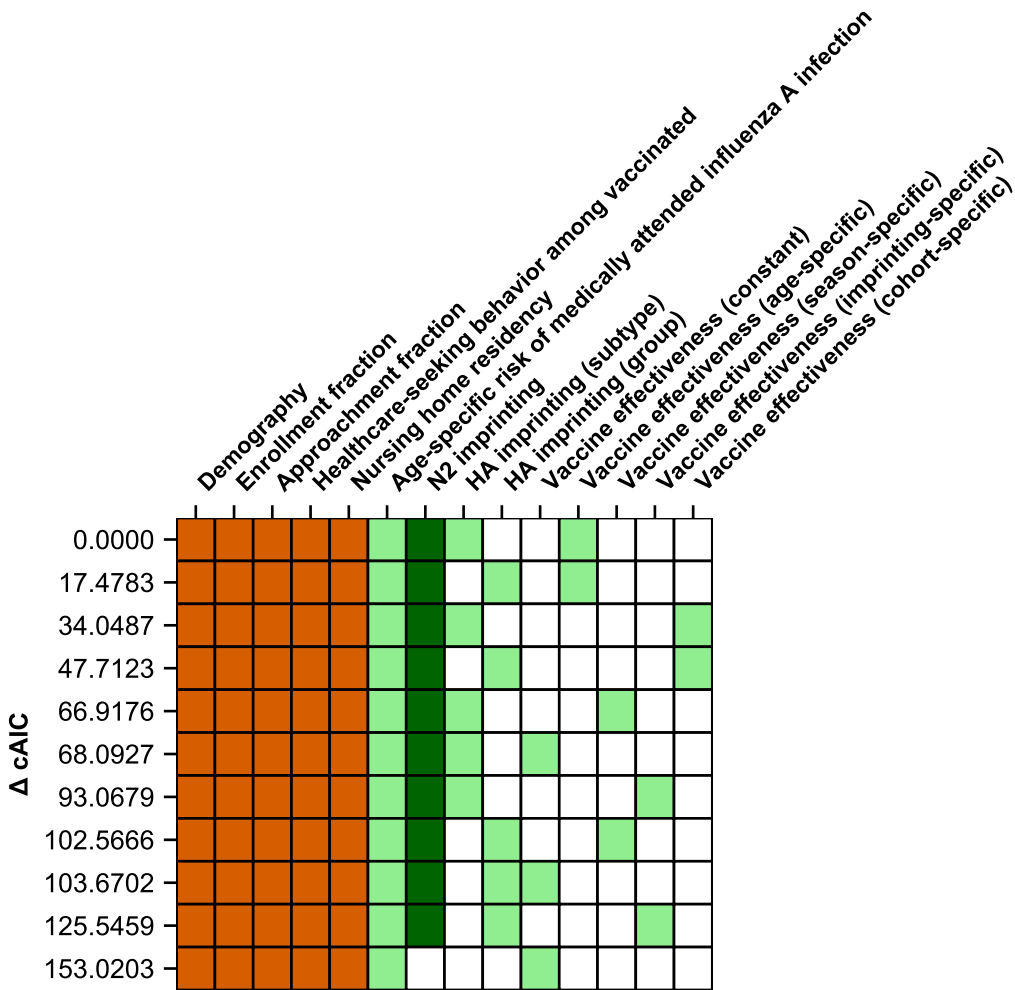

Supplement: supp [file elife-50060-supp-v1.zip]

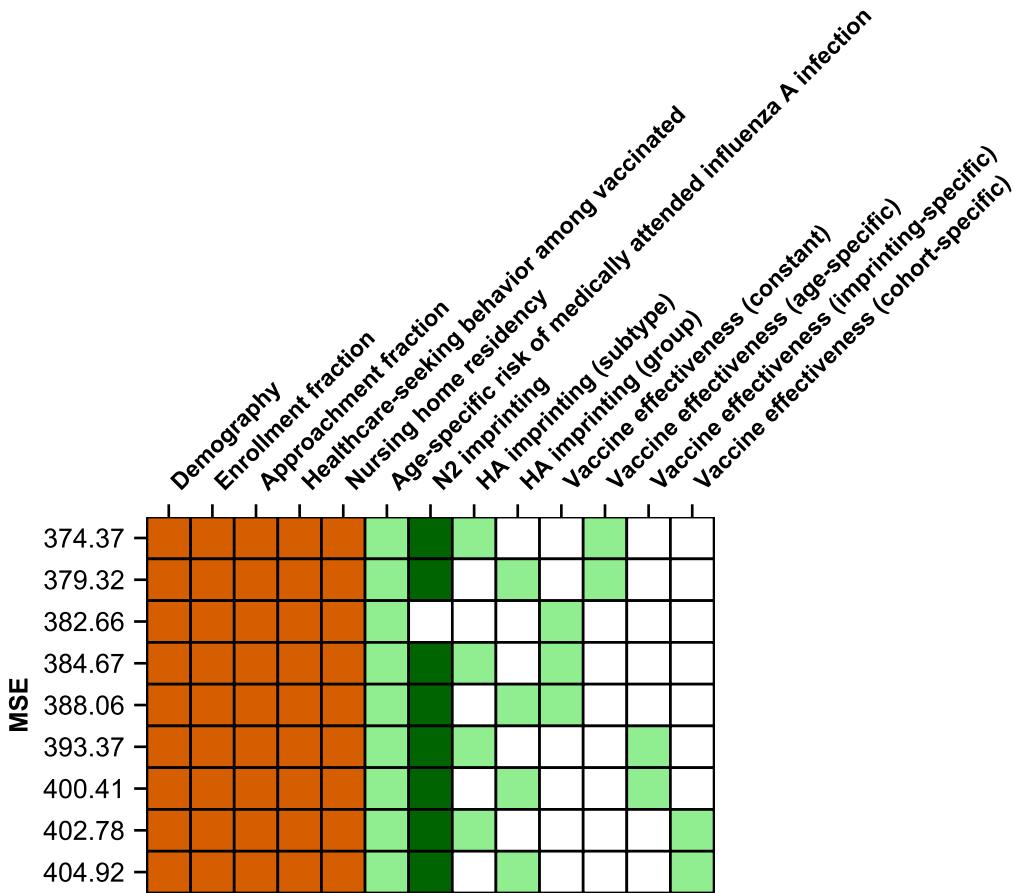

Supplement: supp [file elife-50060-supp-v1.zip]

2007-2008

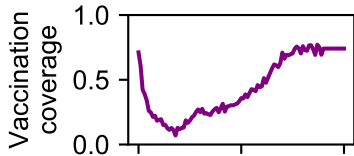

2008-2009

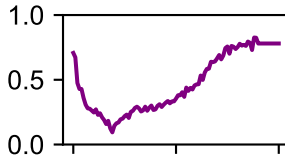2009-2010  
monovalent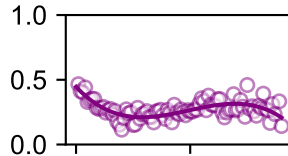2009-2010  
seasonal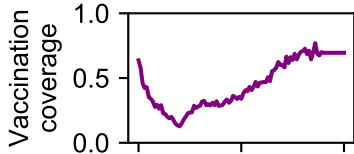

2010-2011

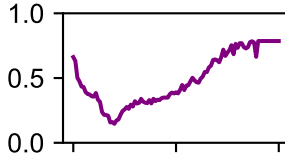

2011-2012

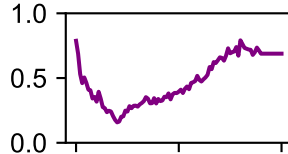

2012-2013

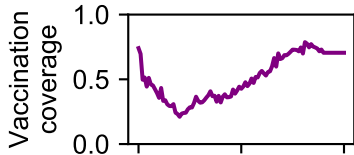

2013-2014

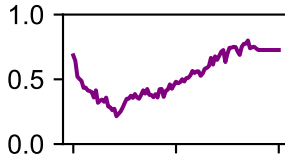

2014-2015

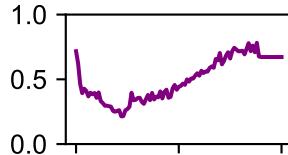

2015-2016

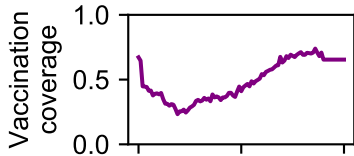

2016-2017

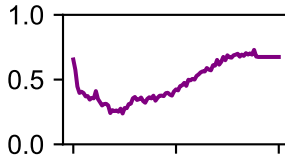

2017-2018

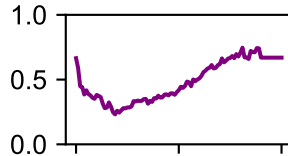

Supplement: supp [file elife-50060-supp-v1.zip]

2007-2008

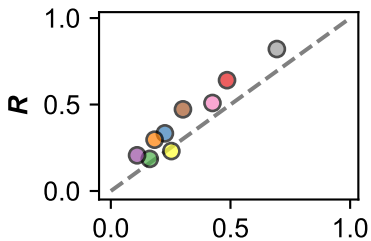

2008-2009

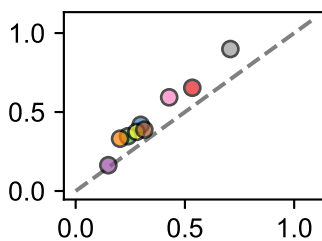

2009-2010

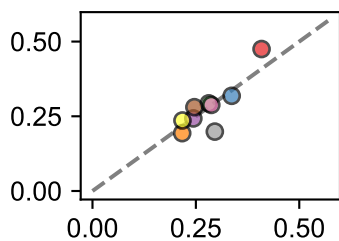

2010-2011

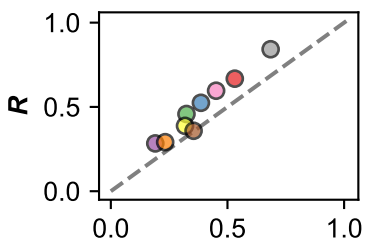

2011-2012

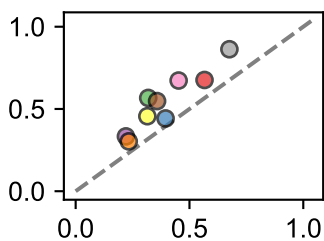

2012-2013

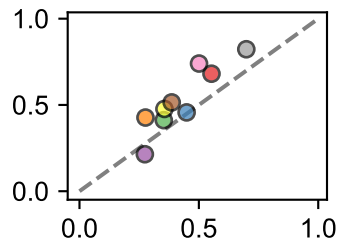

2013-2014

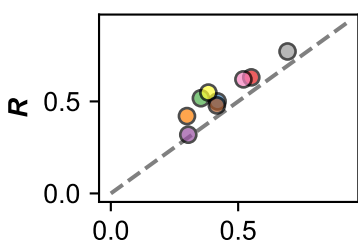

2014-2015

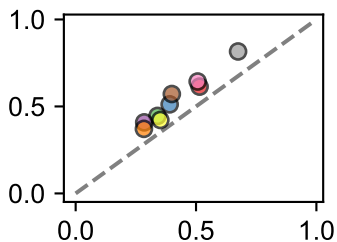

2015-2016

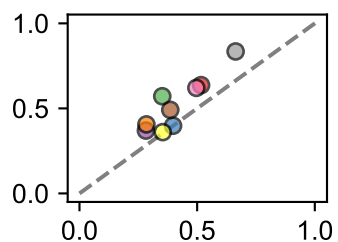

2016-2017

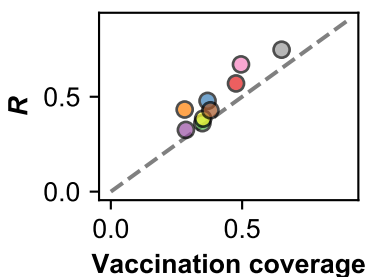

2017-2018

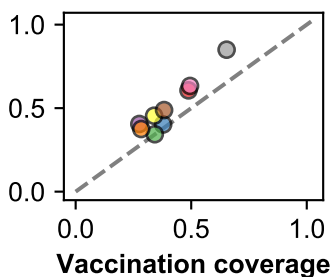**Vaccination coverage**

Age group (years)

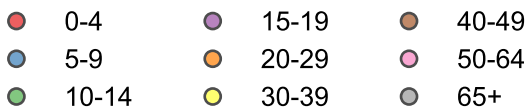

Supplement: supp [file elife-50060-supp-v1.zip]

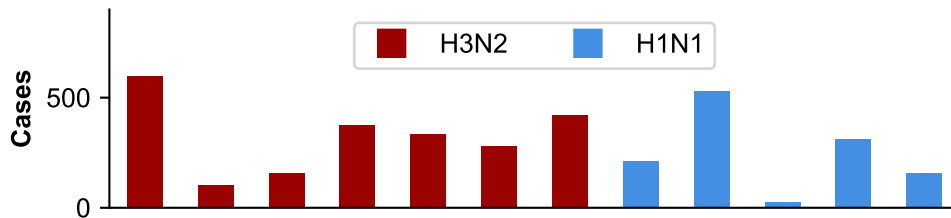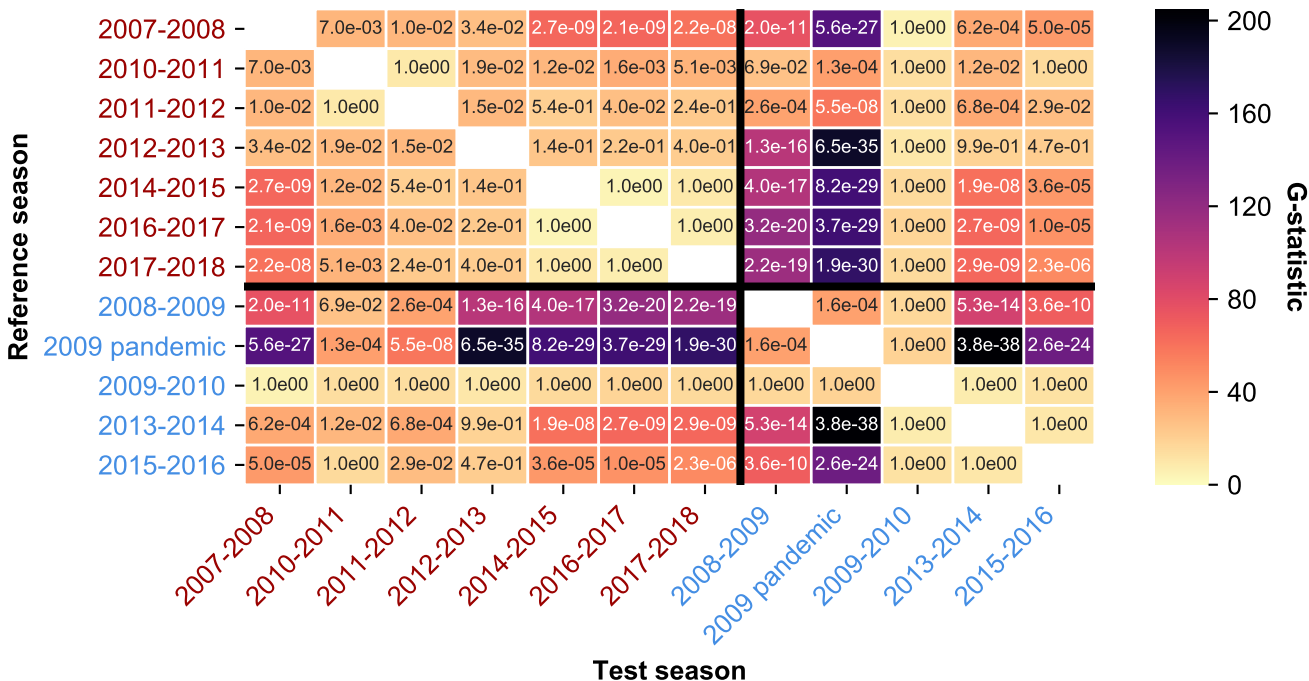

Supplement: supp [file elife-50060-supp-v1.zip]
